# Supplementary material
Source: PubMed Central journal article supplement (PMC5722701)
Supplement: NIHMS919647-supplement.pdf [file NIHMS919647-supplement.pdf]

## **Supporting Information**

### **Small molecule delivery to solid tumors with chitosan-coated PLGA particles: A lesson learned from comparative imaging**

Jinho Park, Yihua Pei, Hyesun Hyun, Mark A. Castanares, David S. Collins, Yoon Yeo \*

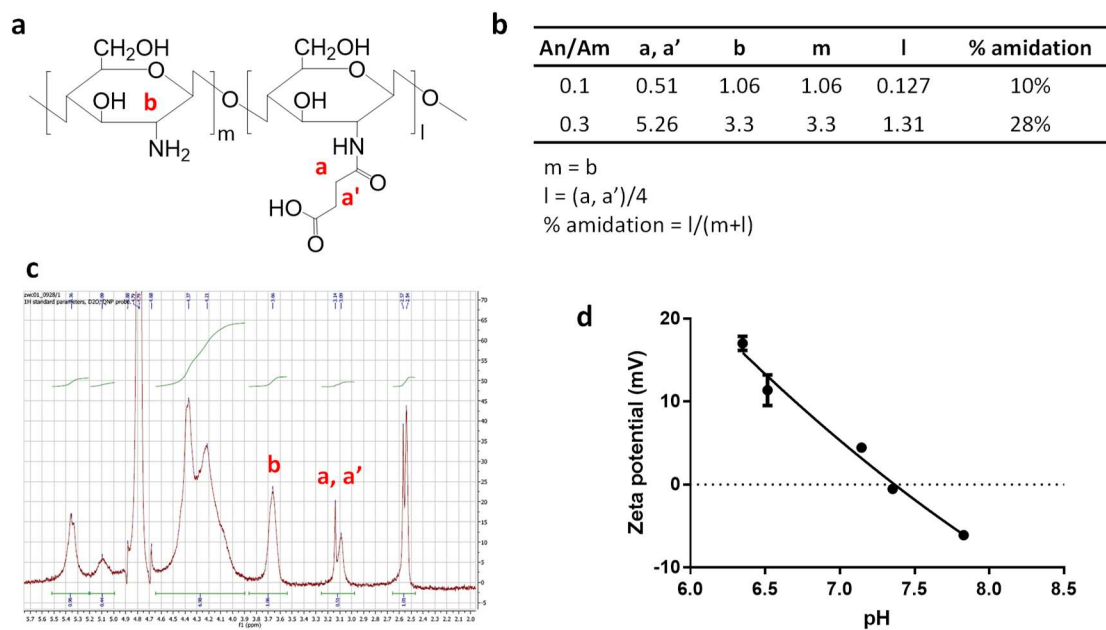

**Supporting Fig. 1.** (a) ZWC structure; (b) % Degree of succinylation of ZWC calculated from  $H^1NMR$ ; (c)  $H^1NMR$  spectrum of  $ZWC_{0.1}$  (solvent: 2%  $CD_3COOD$  in  $D_2O$ , at  $70^\circ C$ ); (d) Zeta potential of  $ZWC_{0.1}$  at different pHs.

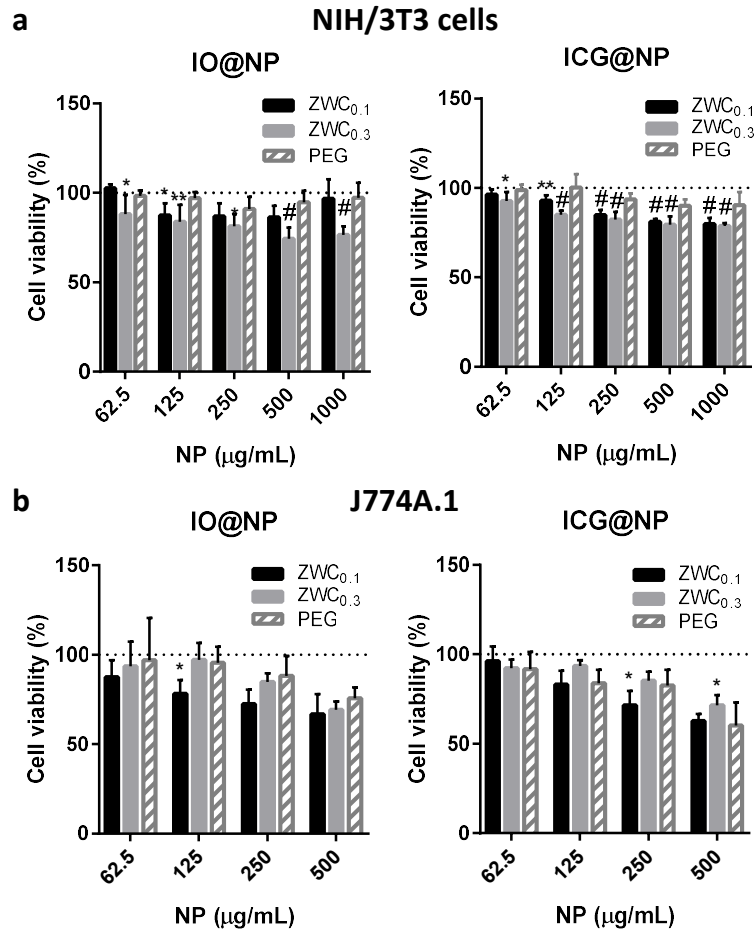

**Supporting Fig. 2.** Cytocompatibility of NPs after 1 day incubation in (a) NIH3T3 fibroblasts and (b) J774A.1 macrophages. Cell viability (%) = Absorbance of formazan formed in treated cells / formazan absorbance of control cells with no treatment. Dotted line: Cell viability of control cells. n=5 replicates. \*: p<0.05; \*\*: p<0.01; #: p<0.001 vs. NP-pD-PEG by Dunnett's multiple comparisons test.

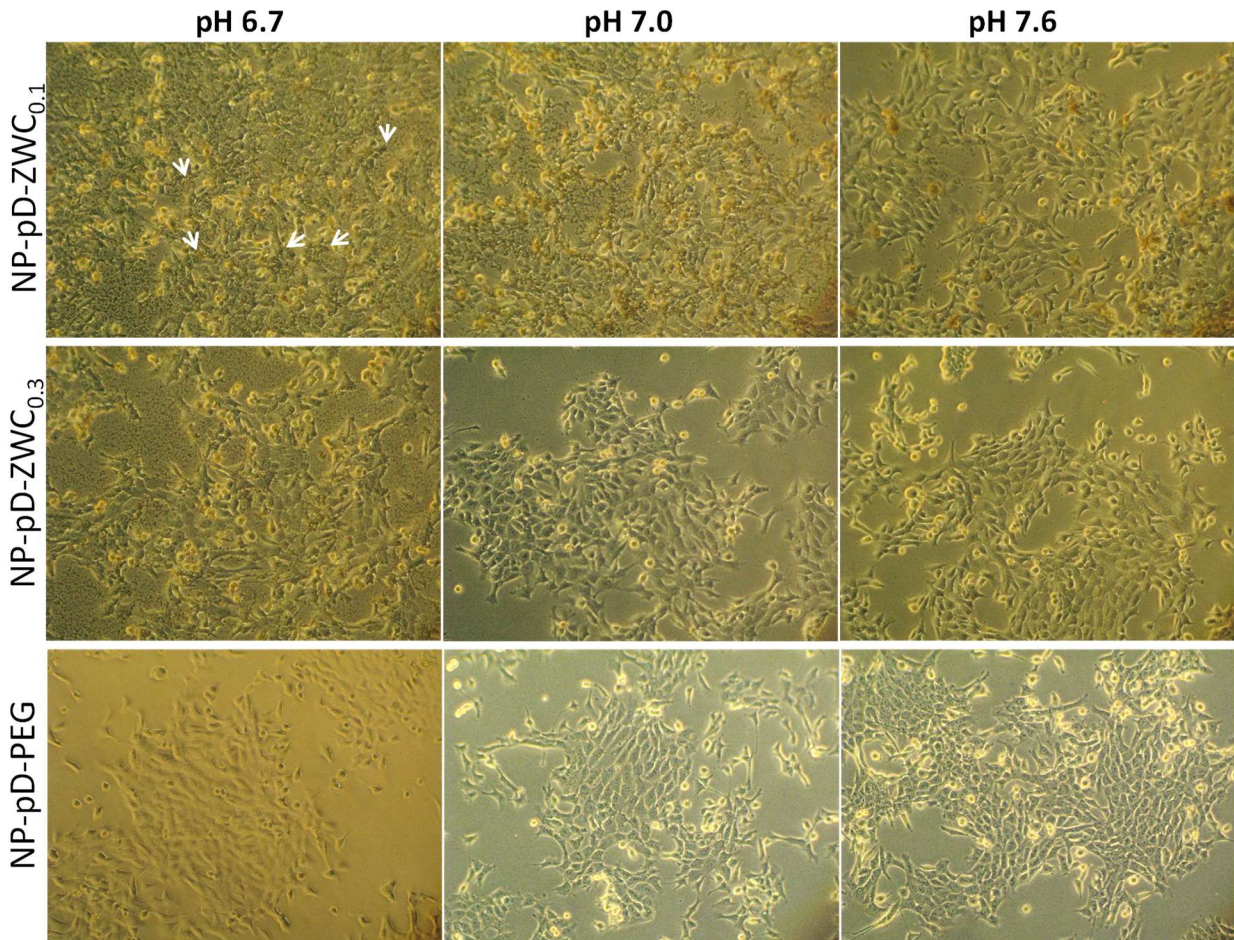

**Supporting Fig. 3.** 4T1 cell images after incubation with surface-modified NPs for 4 h and washing with fresh medium to remove loosely bounded NPs. NP-pD-ZWC<sub>0.1</sub> remained with cells and wells at pH 6.7 and pH 7.0, and NP-pD-ZWC<sub>0.3</sub> persisted likewise at pH 6.7. White arrows show examples of aggregated NPs bound to cells.

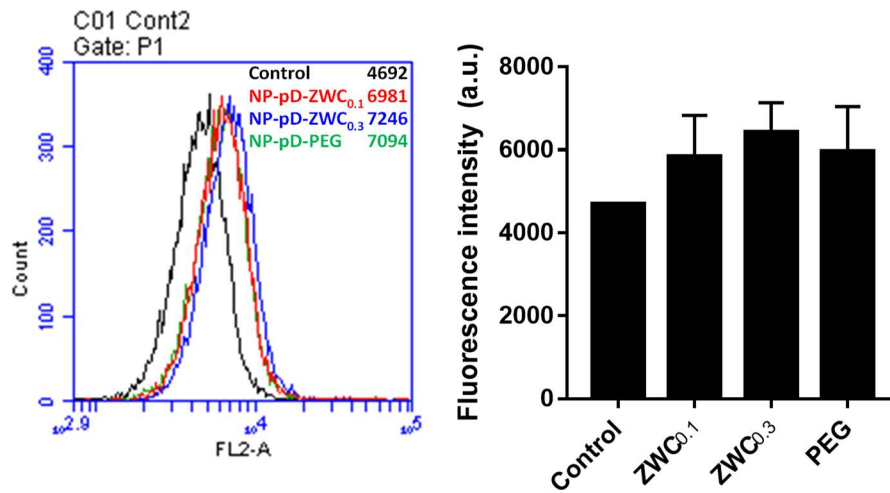

**Supporting Fig. 4.** A representative flow cytometry histogram of J774A.1 macrophages treated with surface-modified Rho-NPs.  $n=3$  independently prepared samples.

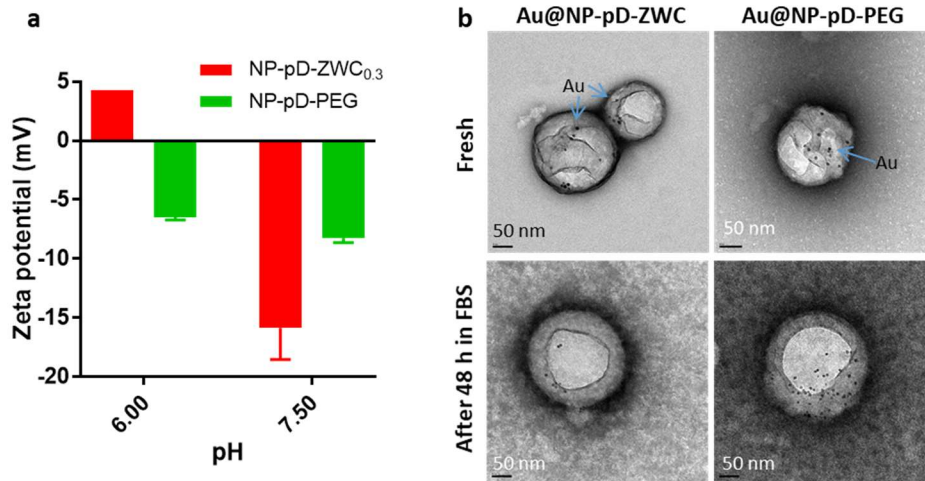

**Supporting Fig. 5.** (a) Zeta potential of surface-modified Au@NPs at different pHs. (b) TEM images of surface-modified Au@NPs. Scale bars: 50 nm.

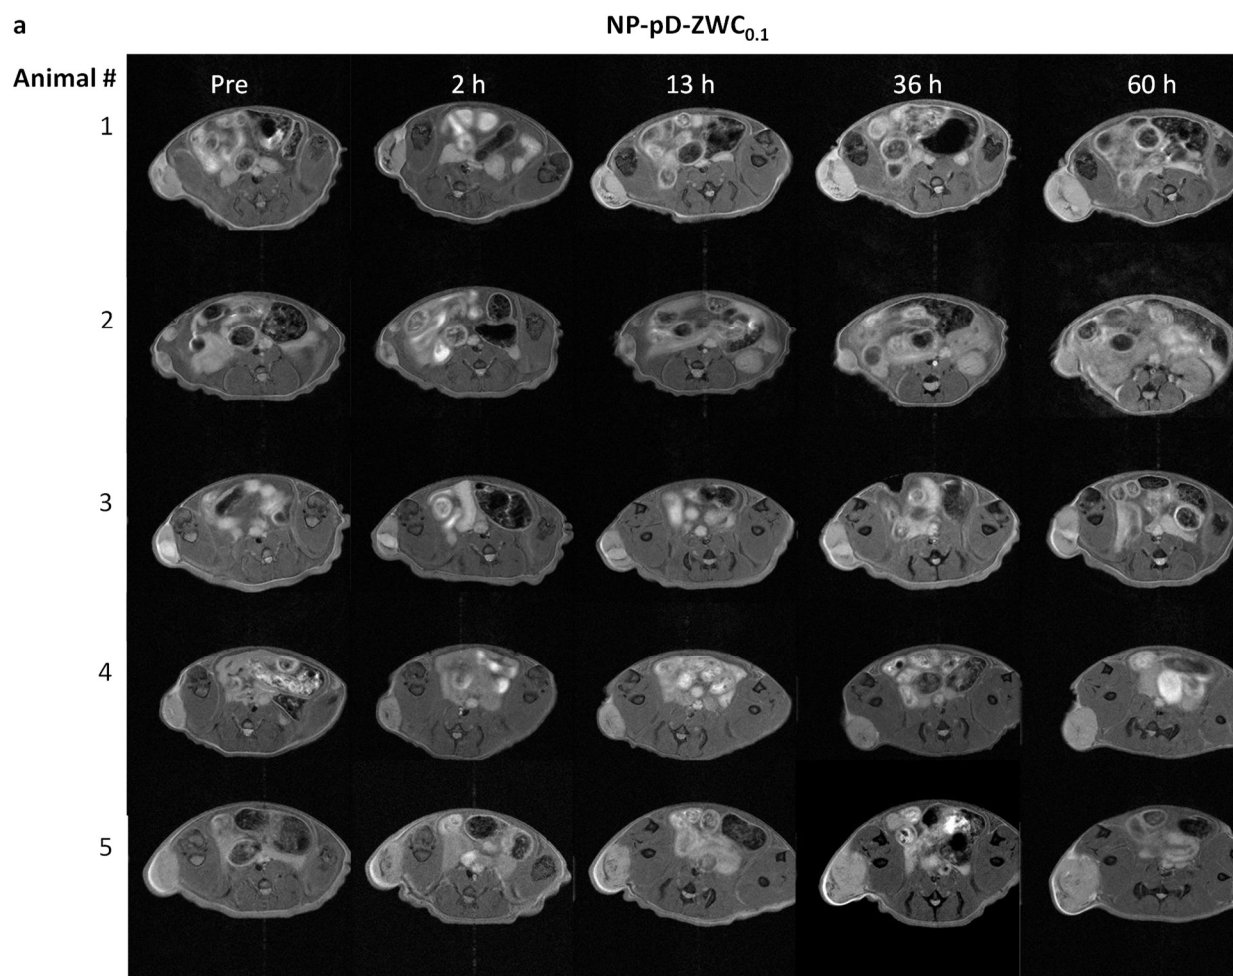

**Supporting Fig. 6.** (a) T2-weighted MR images of LS174T tumors before and after the treatment with (a) IO@NP-pD-ZWC<sub>0.1</sub>.

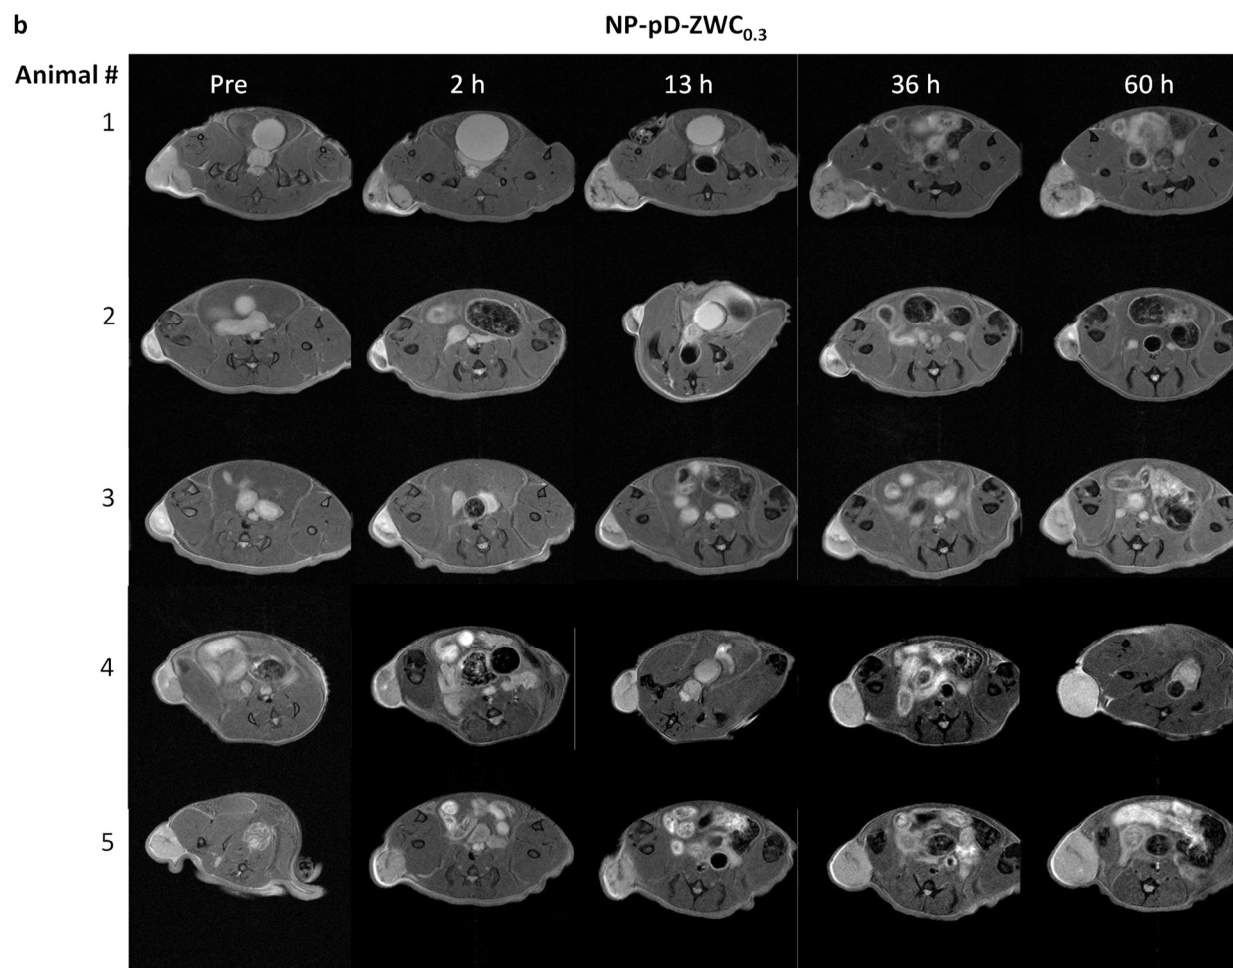

**Supporting Fig. 6.** (b) T2-weighted MR images of LS174T tumors before and after the treatment with (b) IO@NP-pD-ZWC<sub>0.3</sub>.



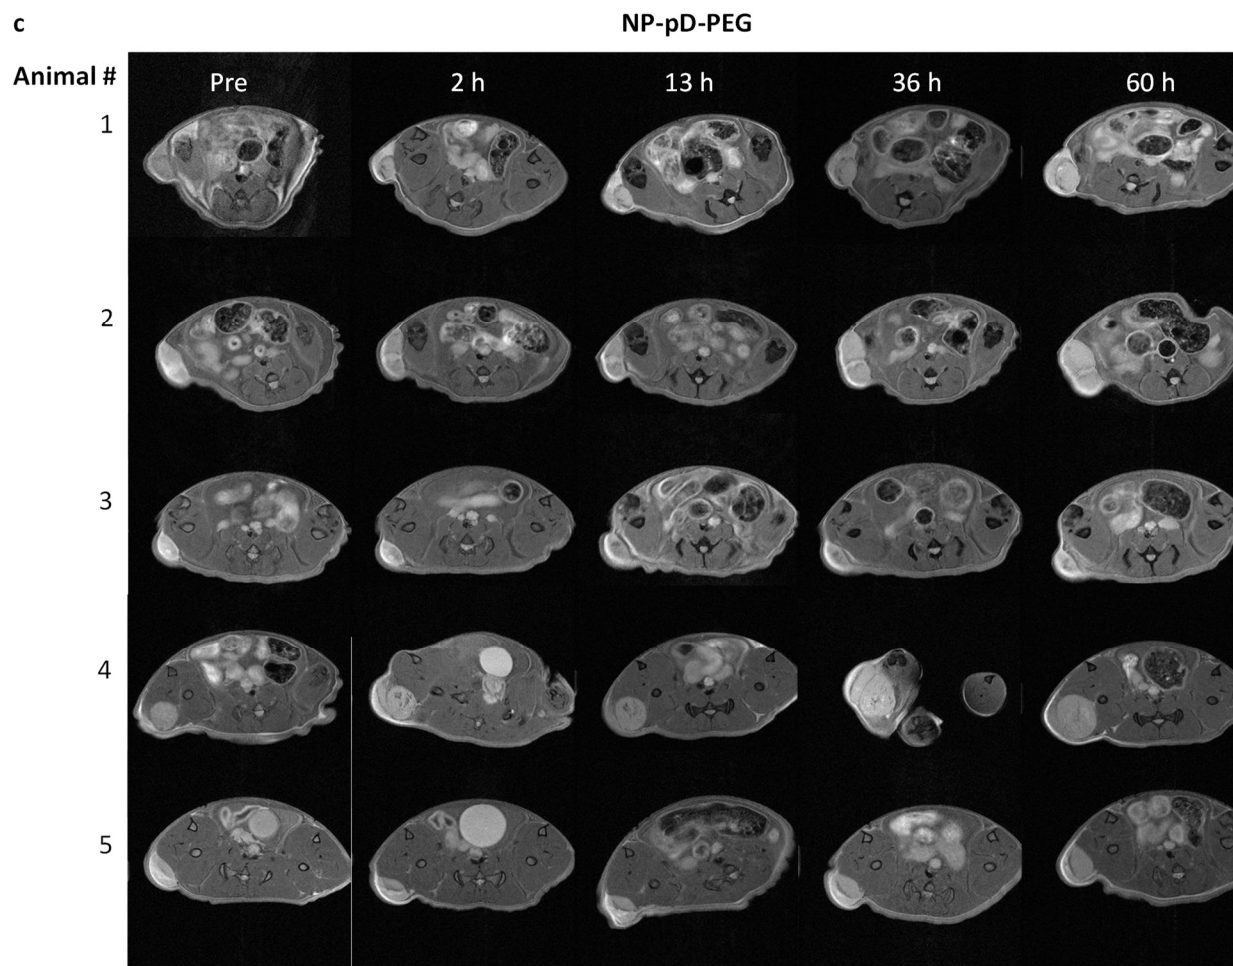

**Supporting Fig. 6.** (c) T2-weighted MR images of LS174T tumors before and after the treatment with (c) IO@NP-pD-PEG.

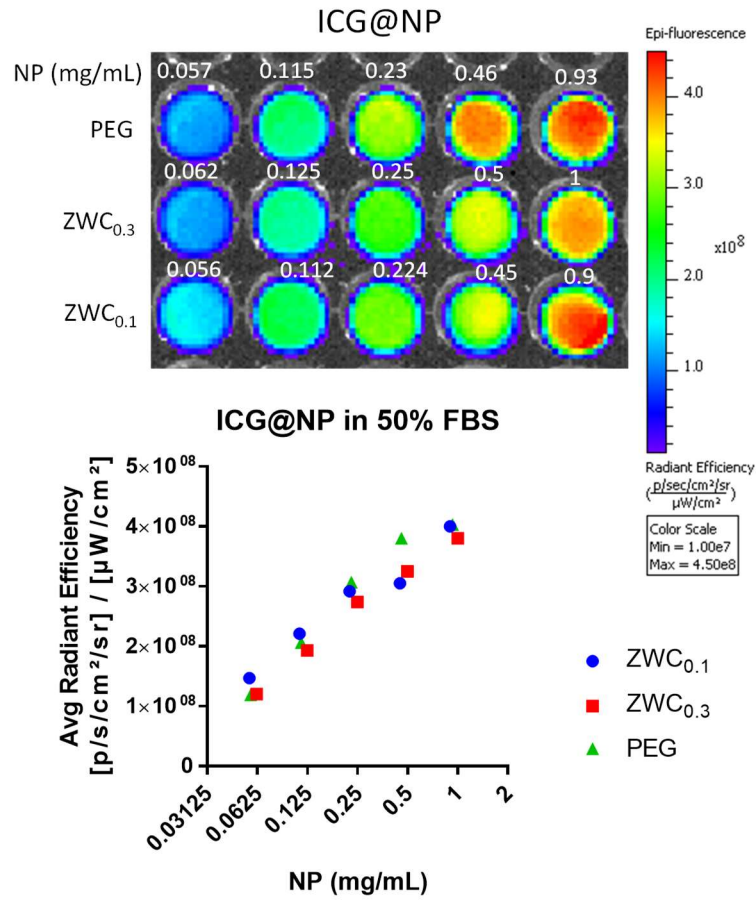

**Supporting Fig. 7.** ICG fluorescence intensity of ICG@NPs in 50% FBS. n=3 measurements of a representative batch.

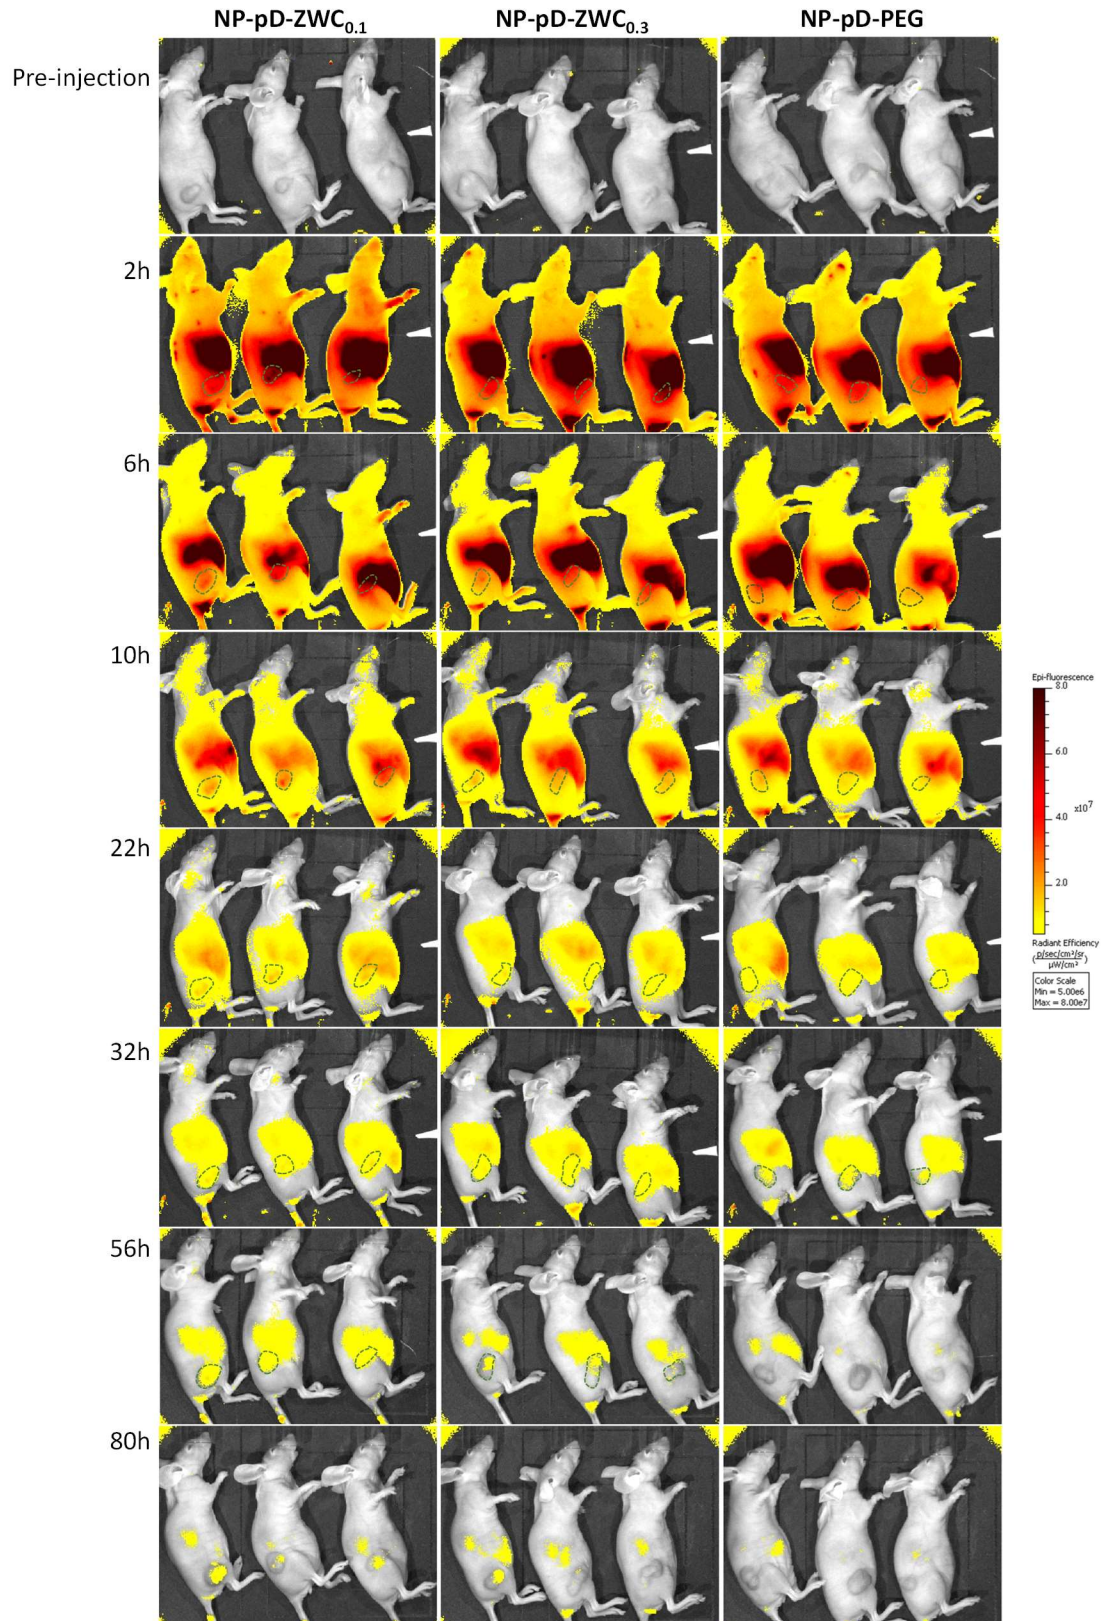

**Supporting Fig. 8.** IVIS images of LS174T tumor-bearing animals treated with (a) IO@NP-pD-ZWC<sub>0.1</sub>, (b) IO@NP-pD-ZWC<sub>0.3</sub>, and (c) IO@NP-pD-PEG .

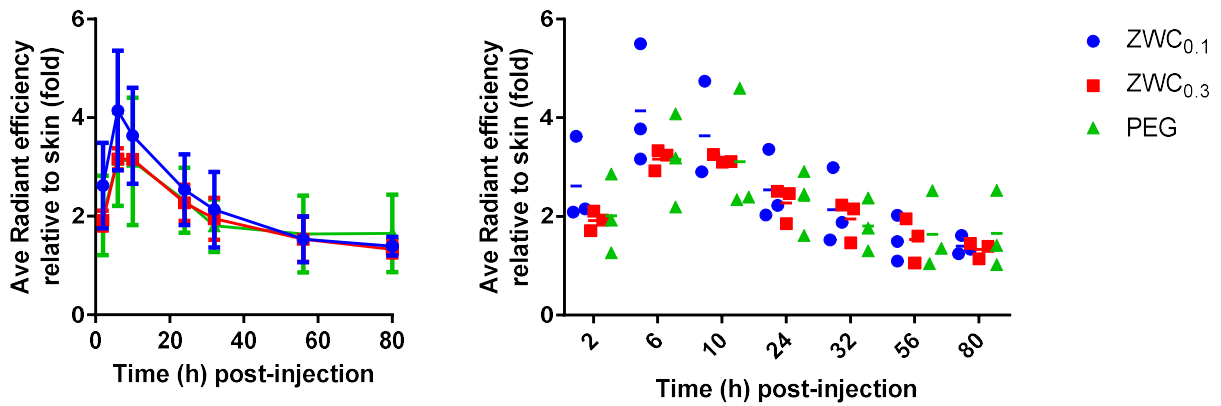

**Supporting Fig. 9.** Radiant efficiency of tumor area relative to the skin of the shoulder front at each time point in two different representations (2<sup>nd</sup> independently performed study. n=3 per treatment, average ± standard deviation).

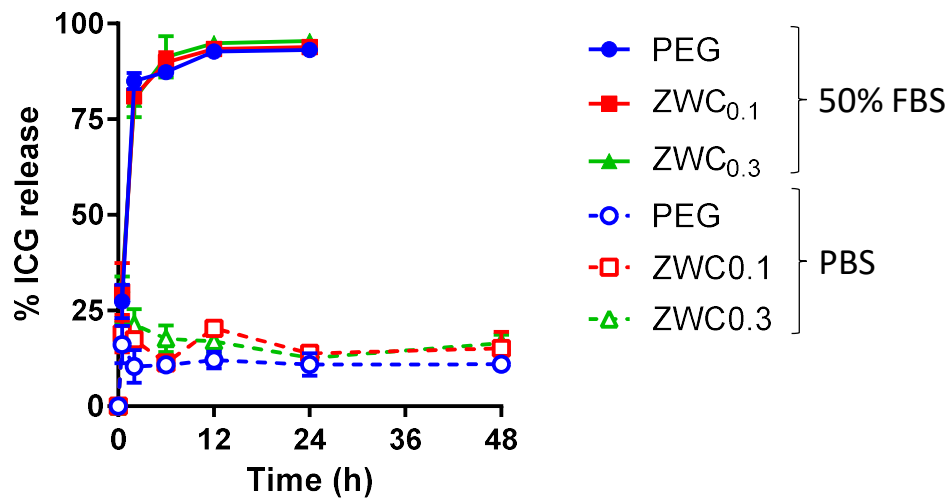

**Supporting Fig. 10.** ICG release from ICG@NPs in 50% FBS vs. PBS. n=3 replicates per sample. ICG@NPs were incubated in 50% FBS/PBS or PBS at a concentration of 0.2 mg/mL. At predetermined time points, NPs were centrifuged at 9200 rcf for 15 min to separate a supernatant and a pellet. The supernatant and the pellet were resuspended in 50% FBS (for NPs incubated in 50% FBS) or 50% ACN (for NPs incubated in PBS), placed in a black 96-well plate and imaged with an IVIS Lumina II system (PerkinElmer, MA).

**Supporting Table.** pH of LS174T tumors measured with a Mettler Toledo InLab solid electrode in animals under isofluorane anesthesia.

| Organs                         | pH        |                |
|--------------------------------|-----------|----------------|
|                                | Mouse 1   | Mouse 2        |
| Tumor (330 mm <sup>3</sup> )   | 7.1-7.2   | Not determined |
| Tumor (>1700 mm <sup>3</sup> ) | 6.70-7.12 | 7.07-7.08      |
| Abdominal cavity               | 7.39-7.40 | 7.38           |
| Liver                          | 7.34-7.40 | 7.25           |
| Blood                          | 7.39-7.42 | 7.38           |
| Heart                          | 7.33-7.45 | 7.34           |
